# Supplementary material for: Essential Role of Mitochondrial Function in Adiponectin Synthesis in Adipocytes
Source: Oxford University Press journal article supplement (doi:10.2337/db07-0510), 2007-09-08
Supplement: db070510onlineindex.doc [file db070510onlineindex.doc]

**MATERIALS AND METHODS**

**Reagents. I**ndinavir was from Merck & Co., Inc. (White House Station, NJ). TNF-α, SP600125,thapsigargin and tunicamycinwere from Calbiochem (San Diego, CA). CCCP, oligomycin, rotenone, TTFA, KCN and chloramphenicol were from Sigma (St. Louis, MO). Antibodies against phospho-eIF2α, total eIF2α, phospho-JNK and total JNK were from Cell Signaling Technology (Danvers, MA). Anti-cytochrome C and anti-cytochrome C oxidase subunit II antibodies were from BD Biosciences (San Jose, CA). Anti-ATF3 and anti-NRF-1 antibodies were from Santa Cruz Biotechnology (Santa Cruz, CA). Anti-β-actin antibody was from Sigma.

Quantification of mtDNA content. The mtDNA content was quantified by an ABI PRISM 7000 sequence detection system (Applied Biosystems, Foster City, CA) using the SYBR Green (Qiagen) (1). Total DNA was extracted from 3T3L1 adipocytes and adipose tissue of mice using a QIAamp DNA mini kit (Qiagen). The reactions were performed as follows: initial denaturing step at 95°C for 10 minutes and 40 cycles of 95°C for 15 seconds and 60°C for 1 minute. The SYBR Green fluorescence was read at the end of each extension step (60°C). A melting curve (loss of fluorescence at a given temperature between 66°C and 94°C) was analyzed to check the specificity of the PCR product. The primer sequences were: forward 5-GCC TTT CAG GAA TAC CAC GA-3; reverse 5- CCA ATT TTA GGG GGT TCG AT-3 (GenBank NM 005089).

**Measurement of adipocytokine concentration.** The levels of leptin, TNF-α, PAI-1 and IL-6 in plasma and culture media were determined by enzyme–linked immunosorbent assay (ELISA) technique according to the manufacturer’s instructions. Leptin, TNF-α and IL-6 ELISA kits were from R&Dsystems (Minneapolis, MN) and PAI-1 kit was from Biosource (Camarillo CA).

**Real-time PCR analysis.** mtTFA mRNA expression levels were quantified by real-time PCR using the ABI PRISM 7000 sequence detection system using a SYBR Green kit according to the manufacturer's protocol. In 96-well optical plates, 12.5 μl SYBR Green master mix was added to 12.5 μl cDNA (corresponding to 50 ng of total RNA input) and 200 nM forward and reverse primers in water. Plates were heated for 10 minutes at 95°C. Next, 40 PCR cycles of 15 seconds at 95°C and 60 seconds at 60°C were performed. 18S rRNA was used as the internal control. Ratios of target gene and 18S rRNA expression levels were calculated by subtracting the *C*t (threshold cycle) of the target gene from the *C*t of 18S rRNA and raising 2 to the power of this difference. The parameter *C*t is defined as the fractional cycle number at which the fluorescence passes the fixed threshold. A plot of the log of initial target copy number for a set of standards versus *C*t is a straight line. Quantification of the amount of target in unknown samples is accomplished by measuring *C*t and using the standard curve to determine starting copy number. The entire process of calculating *C*t, preparing a standard curve, and determining starting copy number for unknowns was performed by the software of the 7700 system (2).

The primers were designed on the basis of the GenBank nucleotide sequences. The gene-specific primers for the measurement mRNA were: mtTFA, forward primer 5-cgattttccacagaacagct-3, reverse primer 5-ccatcagctgacttggagtt-3 (NM 009360). The primers for the measurement of mouse 18S rRNA, an endogenous control gene, were: forward primer 5-GGGAGCCTGAGAAACGGC-3; reverse primer 5-GGGAGCCTGAGAAACGGC-3. The relative amounts of mRNAs were calculated using the relative cycle threshold method (Perkin-Elmer).

**Northern blot analysis.** Total RNA was isolated with TRIzol reagent (Invitrogen) according to the manufacturer’s protocol. 10 g of RNA was denatured in formamide and formaldehyde, then separated by electrophoresis on formaldehyde-containing agarose gels. After RNA was transferred to Nytran membranes, the membranes were cross-linked, hybridized, and washed according to the manufacturer’s recommendations. Probes were labeled by random priming using the Klenow fragment of DNA polymerase I (Promega) and [α-**32**P] dCTP (Amersham Biosciences, Little Chalfont, U.K.). cDNAs used as probes for measurement of adiponectin were: forward 5-ATG CTA CTG TTG CAA GCT CTC-3, reverse 5-GTT GGT ATC ATG GAA GAG AAG-3. The results were normalized to 18S rRNA to correct for variations in sample loading and are expressed as a percentage of control signals (% control) in each blot to correct for variations between blots.

**Western blot analysis.** Differentiated 3T3L1 cells and adipose tissue of mice were lysed in a buffer containing 20 mM Tris-HCl (pH 7.4), 1 mM EDTA, 140 mM NaCl, 1% NP-40, 1 mM Na3VO4, 1 mM phenylmethylsulfonyl fluoride, 50 mM NaF and 10 μg/ml aprotinin. The protein (40–50 μg) was subjected to immunoblotting with specific antibodies. Band intensities were quantified by a densitometer. The results were normalized to β-actin to correct for variations in sample loading and are expressed as percentages of control signals (% control) in each blot to correct for variations between blots.

**Measurement of mitochondrial mass.** 3T3L1 adipocytes treated with 15 M rosiglitazone for 48 hours were trypsinized and centrifuged at 3,000 xg at 4°C for 5 minutes. Cells were resuspended in Kreb’s Ringer solution buffered with HEPES and 0.5% BSA (KRH). About 300,000 cells of each cell type were used for the experiment. Cells were incubated with 0.1 M Mito Tracker Green FM (Molecular Probes, Eugene, OR) in KRH alone for 30 minutes at 37°C. Cells were centrifuged at 3,000 xg at 4°C for 5 minutes and resuspended in 400 l of fresh KRH. Cells were then analyzed using a FACSVantage flow cytometry system (3) (Becton Dickinson Biosciences, San Jose, CA)

**Isolation of mitochondria.** Epididymal adipose tissue was excised and immediately placed in ice-cold mitochondrial isolation buffer (MIB; 250 mM sucrose, 1 mM EDTA, 25 mM Tris-HCl, pH 7.4). The mixture was homogenized with Dounce homogenizer. Homogenized tissue was centrifuged at 10,000 xg for 10 minutes and the pellet was then resuspended in MIB. The mitochondrial layer was removed, diluted in MIB, and centrifuged at 8,000 xg for 10 minutes (4). The mitochondrial pellet was suspended in MIB, and protein was determined by the Bradford assay (Bio-Rad Lab., Hercules, CA).

Electron microscopy. Epididymal adipose tissues of *db/+* and *db/db* mice with or without rosiglitazone treatment were washed in fresh 0.1 M phosphate buffer (pH 7.4) and fixed in 1% glutaraldehyde-4% paraformaldehyde in the same buffer for 4 hours at 4C. Tissues were then washed three times in fresh 0.1 M phosphate buffer (pH 7.4) for 10 minutes. Tissues were fixed in 1% OsO4 for 10 minutes at room temperature and washed three times in water, for 10 minutes each time. Embedding in Epon is performed according to standard techniques after dehydration of the tissues with ethyl alcohol and propylene oxide. Ultrathin sections (60 nm) were cut from the blocks using a Reichart-Jung ultratome E with a diamond knife. The sections were collected and stained with uranyl acetate followed by lead citrate, and then observed using a transmission electron microscope (Hitachi H-7100, Nackashi, Japan).

**Annexin V/ propidium iodide (AV/PI) assay for apoptosis.** Differentiated 3T3L1 adipocytes were washed twice with cold PBS and once in binding buffer (BD Biosciences), then incubated for 10 minutes with 5 μl AV-FITC and 5μl PI in 400 μl binding buffer at ambient temperature in dark room with gentle agitation for 10 minutes. Apoptotic cells was quantified by FACScan flow cytometer using the CellQuest software.

References

1. Bogacka I, Xie H, Bray GA, Smith SR: Pioglitazone induces mitochondrial biogenesis in human subcutaneous adipose tissue in vivo. *Diabetes* 54:1392-1399, 2005

2. Yang WS, Lee WJ, Huang KC, Lee KC, Chao CL, Chen CL, Tai TY, Chuang LM: mRNA levels of the insulin-signaling molecule SORBS1 in the adipose depots of nondiabetic women. *Obes Res* 11:586-590, 2003

3. Wilson-Fritch L, Burkart A, Bell G, Mendelson K, Leszyk J, Nicoloro S, Czech M, Corvera S: Mitochondrial biogenesis and remodeling during adipogenesis and in response to the insulin sensitizer rosiglitazone. *Mol Cell Biol* 23:1085-1094, 2003

4. da-Silva WS, Gomez-Puyou A, de Gomez-Puyou MT, Moreno-Sanchez R, De Felice FG, de Meis L, Oliveira MF, Galina A: Mitochondrial bound hexokinase activity as a preventive antioxidant defense: steady-state ADP formation as a regulatory mechanism of membrane potential and reactive oxygen species generation in mitochondria. *J Biol Chem* 279:39846-39855, 2004
