# Supplementary material for: Essential Role of Mitochondrial Function in Adiponectin Synthesis in Adipocytes
Source: Oxford University Press journal article supplement (doi:10.2337/db07-0510), 2007-09-08
Supplement: db070510supplementaryfig1.doc [file db070510supplementaryfig1.doc]

supplementary Fig. 1. Plasma levels of adipocytokines in 12 weeks-old *db/+* (Lean) and *db/db* mice treated with or without rosiglitazone (Rosi) for 4 weeks (n=5 each), respectively. Plasma leptin (*A*), TNF- (*B*), PAI-1 (*C*) and IL-6 (*D*) were measured by ELISA. **P* < 0.05 versus lean mice. Data are presented as mean ± s.e.m.
