# Supplementary material for: Essential Role of Mitochondrial Function in Adiponectin Synthesis in Adipocytes
Source: Oxford University Press journal article supplement (doi:10.2337/db07-0510), 2007-09-08
Supplement: db070510supplementaryfig4.doc [file db070510supplementaryfig4.doc]

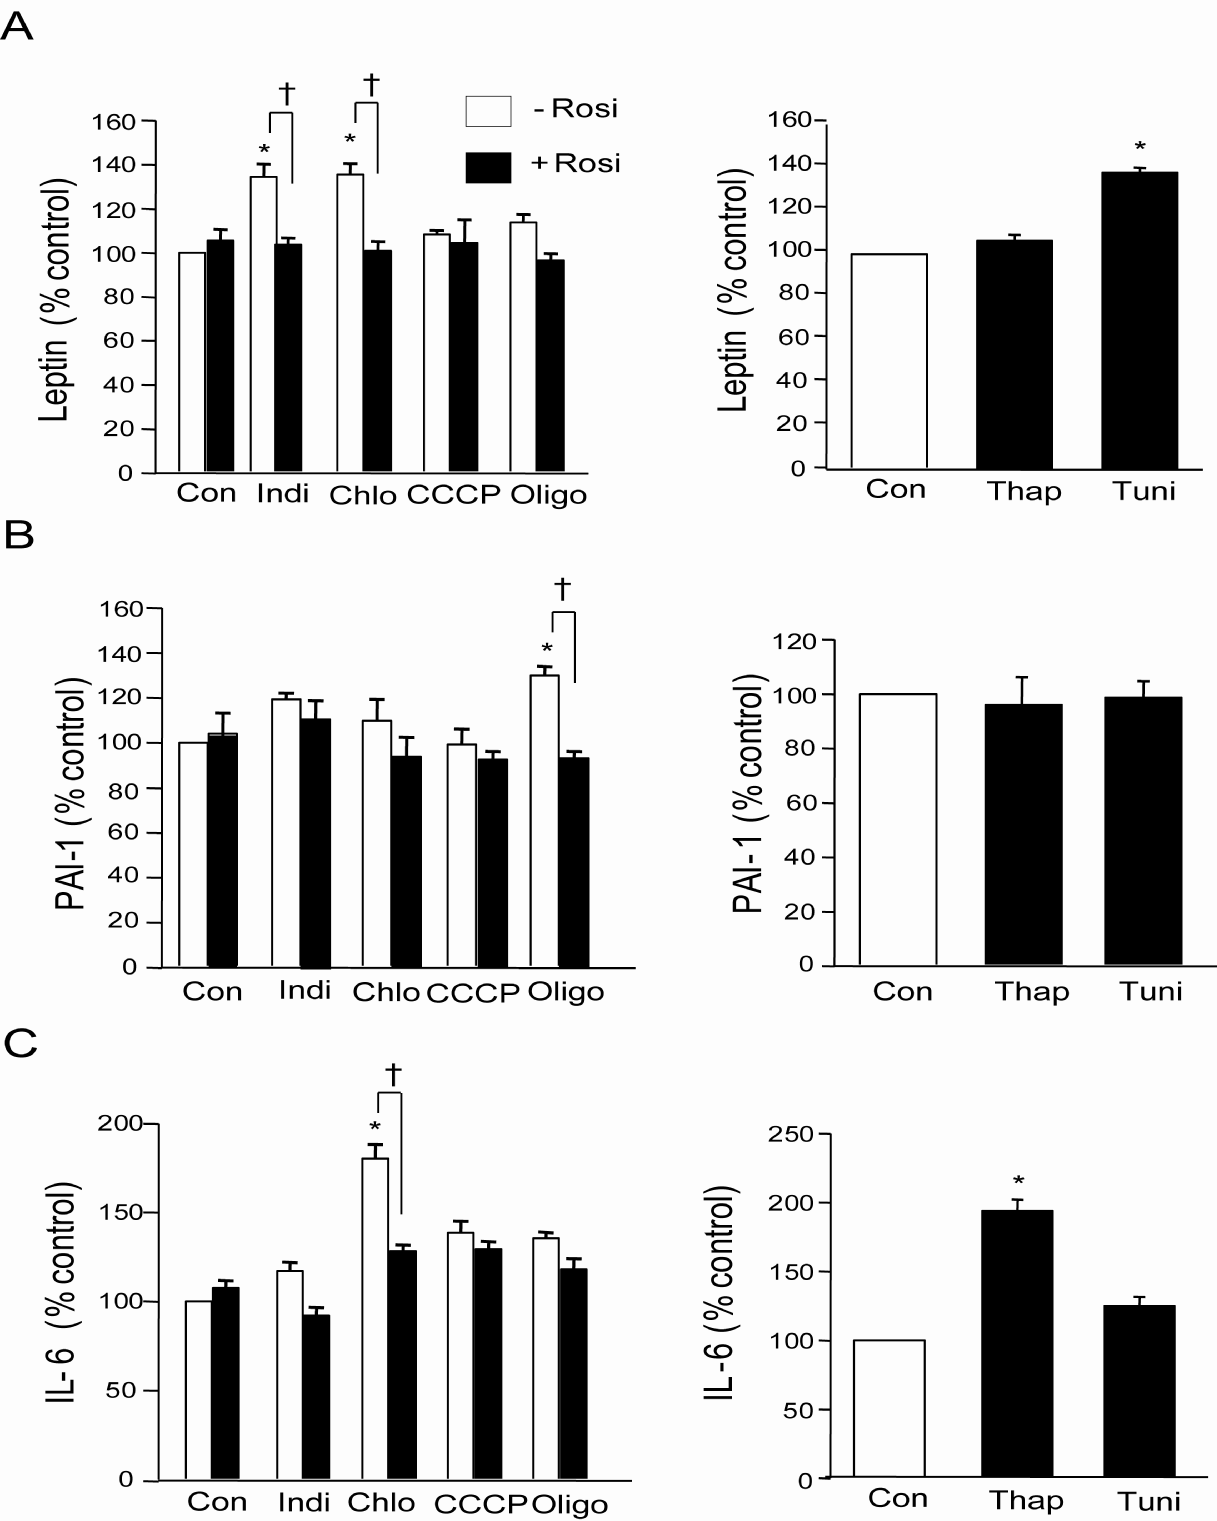


supplementary Fig. 4. Effect of chemicals that induce impaired mitochondrial function and ER stress on leptin, PAI-1, and IL-6 levels in culture media of differentiated 3T3L1 adipocytes. 3T3L1 cells were treated with indinavir (100 μM; Indi), chloramphenicol (309 μM; Chlo), CCCP (1.95 μM) or oligomycin (12.9 μM; Oligo) for 8 hours with or without rosiglitazone (Rosi; 15 M) (n=5 each). Protein levels of leptin (*A*), PAI-1 (*B*) and IL-6 (*C*) in the culture media of 3T3L1 cells were measured by ELISA kits. **P* < 0.05 versus untreated cells; †*P* < 0.05 versus cells not treated with rosiglitazone. Data represent mean  s.e.m.
